# Supplementary material for: Ultrasound Diagnostic and Physiotherapy Approach for a Patient with Parsonage–Turner Syndrome—A Case Report
Source: MDPI journal article supplement (doi:10.3390/s23010501), 2023-01-02
Supplement: s1 [file s1]

## Supplement material legends

Table S1. Care checklist – case study

| Topic                           | Item | Checklist item description                                                                              | Reported on Line            |
|---------------------------------|------|---------------------------------------------------------------------------------------------------------|-----------------------------|
| <b>Title</b>                    | 1    | The diagnosis or intervention of primary focus followed by the words “case report”.                     | 2-3                         |
| <b>Key Words</b>                | 2    | 2 to 5 key words that identify diagnoses or interventions in this case report, including “case report”. | 29-30                       |
| <b>Abstract (no references)</b> | 3a   | Introduction: What is unique about this case and what does it add to the scientific literature?         | 15-16                       |
|                                 | 3b   | Main symptoms and/or important clinical findings.                                                       | 16-17, 22-23                |
|                                 | 3c   | The main diagnoses, therapeutic interventions, and outcomes.                                            | 17-20, 21-22, 22-24         |
|                                 | 3d   | Conclusion—What is the main “take-away” lesson(s) from this case?                                       | 24-28                       |
| <b>Introduction</b>             | 4    | One or two paragraphs summarising why this case is unique (may include references).                     | 56-63, 78-79                |
| <b>Patient information</b>      | 5a   | De-identified patient specific information.                                                             | 83-86                       |
|                                 | 5b   | Primary concerns and symptoms of the patient.                                                           | 97-98 (Table 1)             |
|                                 | 5c   | Medical, family, and psycho-social history including relevant genetic information.                      | 85                          |
|                                 | 5d   | Relevant past interventions with outcomes.                                                              | No                          |
| <b>Clinical Findings</b>        | 6    | Describe significant physical examination (PE) and important clinical findings.                         | 97-98 (Table 1)             |
| <b>Timeline</b>                 | 7    | Historical and current information from this episode of care organized as a timeline.                   | 97-98 (Table 1)             |
| <b>Diagnostic Assessment</b>    | 8a   | Diagnostic testing (such as PE, laboratory testing, imaging, surveys).                                  | 97-98 (Table 1)             |
|                                 | 8b   | Diagnostic challenges (such as access to testing, financial, or cultural).                              | No                          |
|                                 | 8c   | Diagnosis (including other diagnoses considered).                                                       | 97-98 (Table 1)             |
|                                 | 8d   | Prognosis (such as staging in oncology) where applicable.                                               | No                          |
| <b>Therapeutic intervention</b> | 9a   | Types of therapeutic intervention (such as pharmacologic, surgical, preventive, self-care).             | 97-98 (Table 1),<br>151-189 |

|                               |     |                                                                                                         |         |
|-------------------------------|-----|---------------------------------------------------------------------------------------------------------|---------|
|                               | 9b  | Administration of therapeutic intervention (such as dosage, strength, duration).                        | 186-189 |
|                               | 9c  | Changes in therapeutic intervention (with rationale).                                                   | No      |
| <b>Follow-up and Outcomes</b> | 10a | Clinician and patient-assessed outcomes (if available).                                                 | 191-211 |
|                               | 10b | Important follow-up diagnostic and other test results.                                                  | 208-211 |
|                               | 10c | Intervention adherence and tolerability. (How was this assessed?)                                       | 194-196 |
|                               | 10d | Adverse and unanticipated events.                                                                       | No      |
| <b>Discussion</b>             | 11a | A scientific discussion of the strengths AND limitations associated with this case report.              | 301-303 |
|                               | 11b | Discussion of the relevant medical literature with references.                                          | 270-296 |
|                               | 11c | The scientific rationale for any conclusions (including assessment of possible causes).                 | 276-283 |
|                               | 11d | The primary “take-away” lessons of this case report (without references) in a one paragraph conclusion. | 311-321 |
| <b>Patient Perspective</b>    | 12  | The patient should share their perspective in one to two paragraphs on the treatment(s) they received.  | 208-211 |
| <b>Informed Consent</b>       | 13  | Did the patient give informed consent? Please provide if requested.                                     | Yes     |

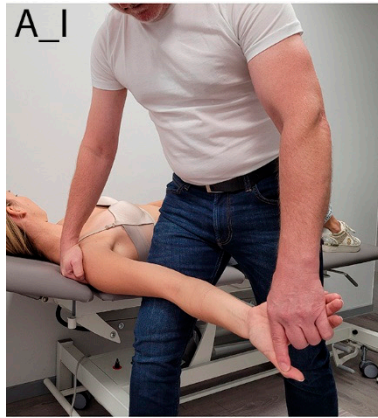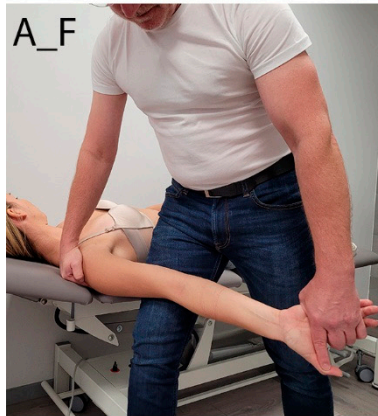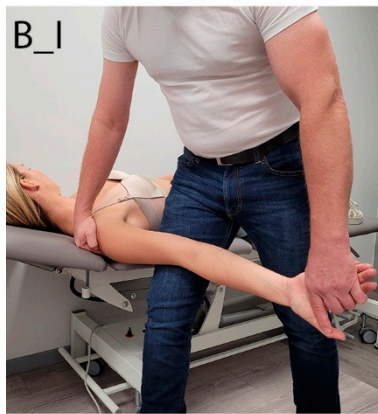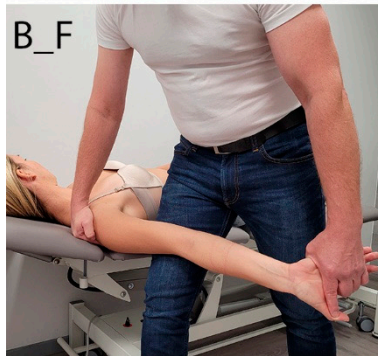

**Figure S1.** **A-** Proximal median nerve neurodynamic technique; **B-** Distal median nerve neurodynamic technique; **I** – initial position, **F** – final position.

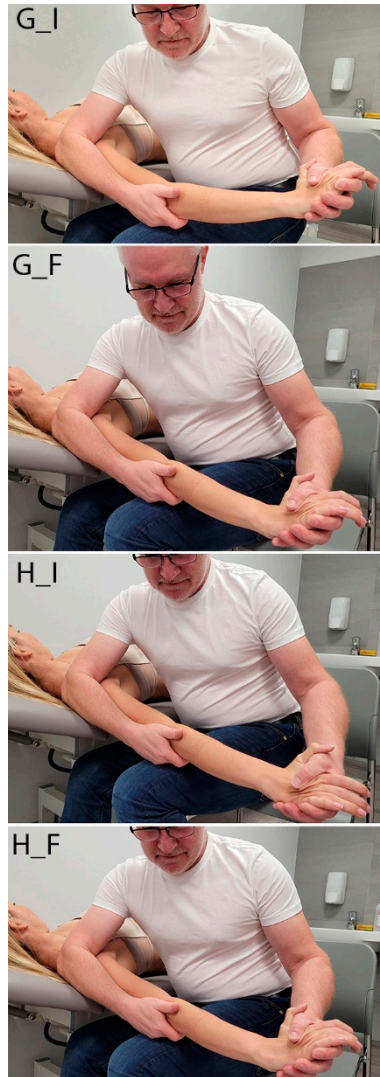

**Figure S2.** **G-** Proximal ulnar nerve neurodynamic technique; **H-** Distal ulnar nerve neurodynamic technique; **I** – initial position, **F** – final position.

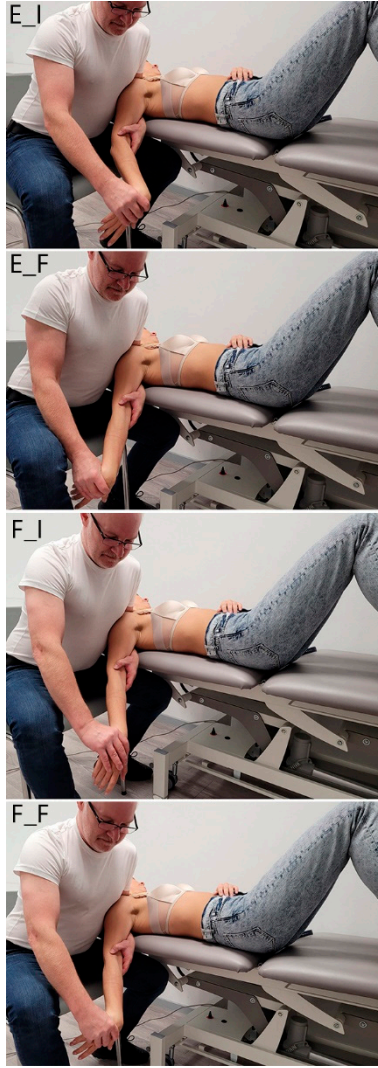

**Figure S3.** E- Proximal radial nerve neurodynamic technique; F- Distal radial nerve neurodynamic technique; I – initial position, F – final position.

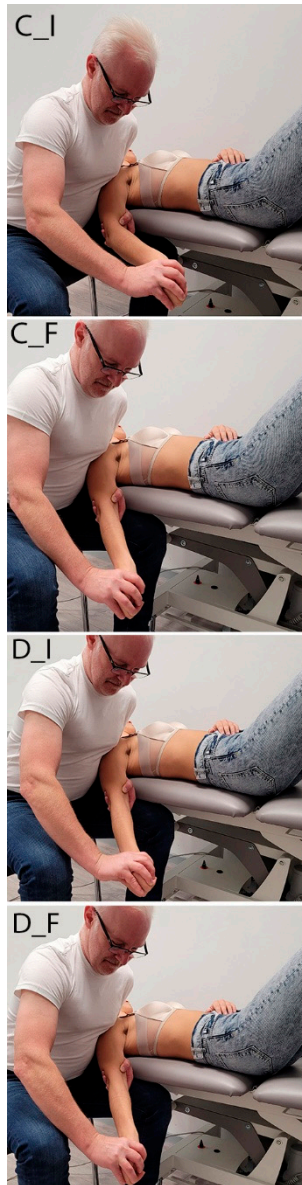

**Figure S4.** C- Proximal musculocutaneous nerve neurodynamic technique; D- Distal musculocutaneous nerve neurodynamic technique; I – initial position, F – final position.
